# Supplementary material
Source: PubMed Central journal article supplement (PMC3424046)
Supplement: supp_dev.080762_DEV080762.pdf [file supp_dev.080762_DEV080762.pdf]

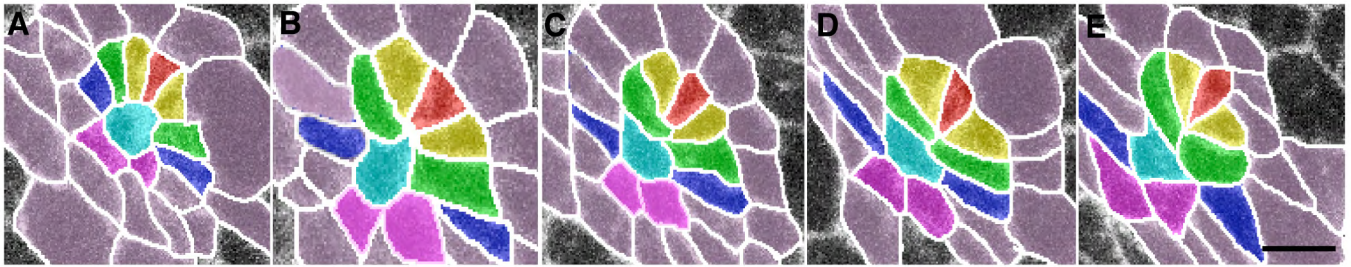

**Fig. S1. Live imaging of a developing ommatidium.** (A-E) Stills from supplementary material Movies 3 and 4. Red is R8, the presumptive R2/R5 are yellow and the presumptive R3/R4 are green (Wolff and Ready, 1976). The mystery cell 1 is turquoise. Random cells are annotated in blue and pink. (A) Type1-arc. (B) 6-cell rosette. (C) The AJ between R3 and R4 starts to elongate. (D,E) 5-cell pre-cluster. A red arrow indicates the axis of symmetry of an ommatidium that rotates in the plane of the epithelium. Scale bar: 2  $\mu\text{m}$ .

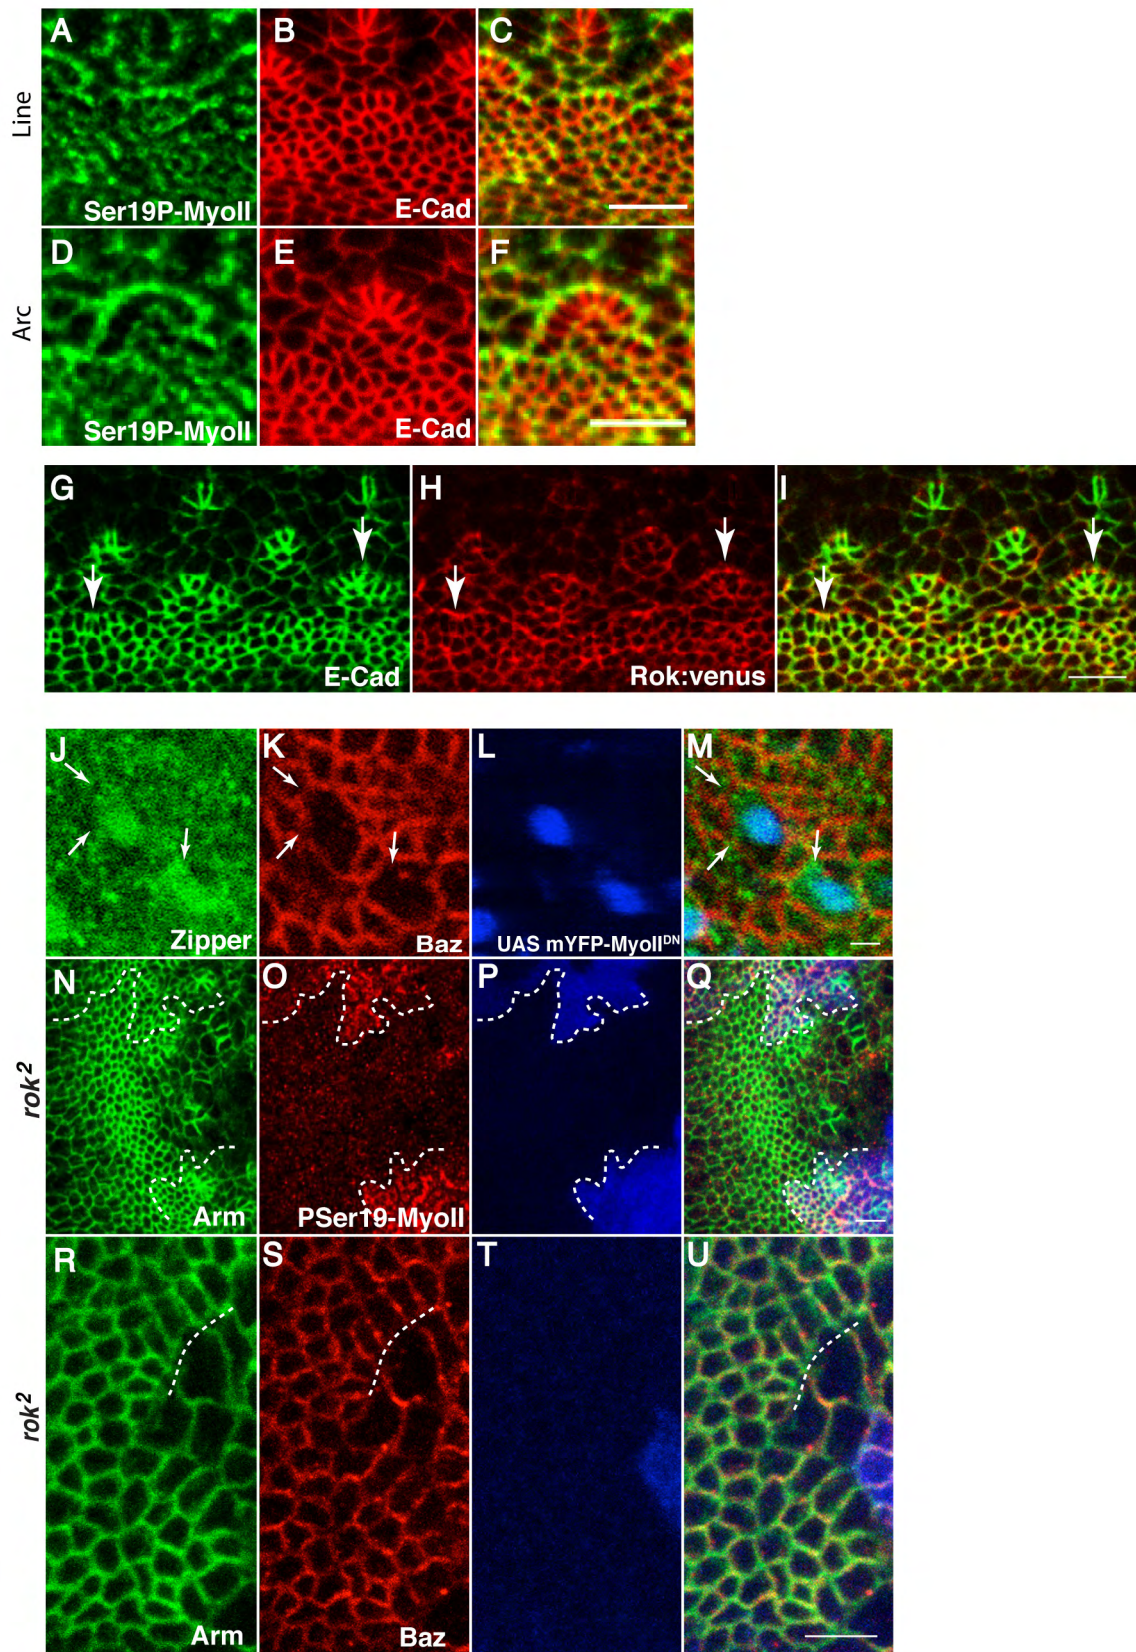

**Fig. S2. Rok, MyoII and early multicellular patterning in the retina.** (A-F) Ser19P-MyoII (green) and E-Cad (red) staining illustrate a typical line (A-C) and a typical arc (D-F). (G-I) Eye discs expressing Rok::Venus (red) stained for E-Cad (green). Arrows indicate typical lines and arcs. (J-M) High magnification of two cells in the MF, expressing the YFP-MyoII<sup>DN</sup> transgene (blue). Zipper (Myosin Heavy Chain; zip – FlyBase) is shown in J and Baz is shown in K. White arrows indicate medial MyoII meshwork. (N-Q) *rok*<sup>2</sup> clones lack GFP (blue). Arm (green), SerP19-MyoII (red). Dashed line delineates the mutant tissue. (R-U) *rok*<sup>2</sup> clones lack GFP (blue). Arm (green) and Baz (red). Dashed line highlights a line of cells. Scale bars: in A-I, N-U, 5 μm; in J-M, 1 μm.

**Table S1. Average length of posterior AJs and mediolateral AJs in lines and arcs**

|              | Average length of posterior AJs ( $\mu\text{m}$ ) | s.d. | Number of AJs | Average length of mediolateral AJs ( $\mu\text{m}$ ) | s.d. | Number of AJs |
|--------------|---------------------------------------------------|------|---------------|------------------------------------------------------|------|---------------|
| <b>Lines</b> | 0.83                                              | 0.27 | 26            | 1.36                                                 | 0.22 | 26            |
| <b>Arcs</b>  | 0.95                                              | 0.25 | 32            | 1.41                                                 | 0.23 | 32            |

Three animals quantified

**Table S2. Average mean pixel intensity of Baz, E-Cad and Myo II in posterior AJs relative to mediolateral AJs in lines and arcs**

|              |               | Average mean pixel intensity at posterior AJs relative to mediolateral AJs | s.d. of the average | Number of lines/arcs quantified |
|--------------|---------------|----------------------------------------------------------------------------|---------------------|---------------------------------|
| <b>Lines</b> | <b>E-Cad</b>  | 0.79                                                                       | 0.07                | 5                               |
|              | <b>Myo II</b> | 2.00                                                                       | 0.31                | 5                               |
|              | <b>Baz</b>    | 0.56                                                                       | 0.17                | 6                               |
| <b>Arcs</b>  | <b>E-Cad</b>  | 0.65                                                                       | 0.06                | 5                               |
|              | <b>Myo II</b> | 2.51                                                                       | 0.23                | 5                               |
|              | <b>Baz</b>    | 0.52                                                                       | 0.09                | 5                               |

Five animals quantified

**Table S3. Average apical surface area and perimeter of MF cells in *ato* clones**

|                       | Average apical surface area ( $\mu\text{m}^2$ ) | s.d. of the average | Average apical perimeter ( $\mu\text{m}$ ) | s.d. of the average | Number of cells |
|-----------------------|-------------------------------------------------|---------------------|--------------------------------------------|---------------------|-----------------|
| <b>WT tissue</b>      | 0.97                                            | 0.16                | 3.89                                       | 0.35                | 20              |
| <b>Clone interior</b> | 1.49                                            | 0.28                | 4.83                                       | 0.43                | 19              |

Example in Fig. 5E-G quantified (representative of five animals)

**Table S4. Average mean pixel intensity of E-Cad in *ato* clones**

|                       | Average mean pixel intensity of E-Cad | s.d. of the average | Number of AJs |
|-----------------------|---------------------------------------|---------------------|---------------|
| <b>WT tissue</b>      | 183                                   | 21.6                | 30            |
| <b>Clone interior</b> | 130                                   | 25.8                | 30            |

Example in Fig. 5E-G quantified

**Table S5. Average mean pixel intensity of E-cad in *UAS-ato* clones in the anterior compartment**

|                        | <b>Average mean pixel intensity of E-Cad</b> | <b>s.d. of the average</b> | <b>Number of AJs</b> |
|------------------------|----------------------------------------------|----------------------------|----------------------|
| <b>WT tissue</b>       | 92                                           | 23                         | 20                   |
| <b>Clone interior</b>  | 209.4                                        | 31                         | 17                   |
| <b>Clone interface</b> | 113.5                                        | 32.5                       | 22                   |

Example in Fig. 5J-M quantified (representative of ten animals)

**Table S6. Average mean pixel intensity of Baz in *UAS-ato* clones in the anterior compartment**

|                        | <b>Average mean pixel intensity of Baz</b> | <b>s.d. of the average</b> | <b>Number of AJs</b> |
|------------------------|--------------------------------------------|----------------------------|----------------------|
| <b>WT tissue</b>       | 120                                        | 20                         | 20                   |
| <b>Clone interior</b>  | 157                                        | 44.3                       | 20                   |
| <b>Clone interface</b> | 71                                         | 14.6                       | 16                   |

Example in Fig. 5N-Q quantified
